# Supplementary material
Source: Springer Nature journal article supplement (https://www.springermedizin.de/resource/supplementary/13063_2012_1271_MOESM1_ESM.pdf/9620458)
Supplement: MOESM1 [file 9620458]

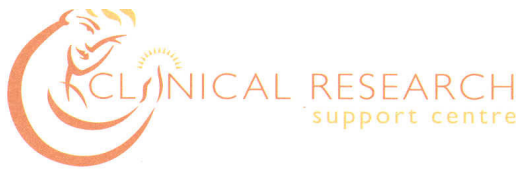

# KARE

---

## **Keratinocyte growth factor in Acute lung injury to REduce pulmonary dysfunction – a randomised placebo controlled trial**

Protocol No: 10089DMCA-CS  
EudraCT Number: 2010-021186-70  
ISRCTN: ISRCTN95690673

### **STATISTICAL ANALYSIS PLAN**

Final Version 3.0

---

**Northern Ireland Clinical Research Support Centre**

1<sup>st</sup> Floor Elliott Dynes Building  
The Royal Hospitals  
Belfast  
BT12 6BA

**Tel:** +44 (0)28 9063 5794

**Fax:** +44 (0)28 9063 3328

**Email:** info@crsc.n-i.nhs.uk

This document and all preceding versions will be stored in the Trial Master File for this trial

---

**Version date:** 30/08/2013

**Contacts**

Cliona McDowell – Biostatistician

|                    |                                                  |           |
|--------------------|--------------------------------------------------|-----------|
| <b>Contents</b>    | <b>1.Background and Design.....</b>              | <b>3</b>  |
| <b>2.</b>          | <b>Outcome measures.....</b>                     | <b>5</b>  |
| 2.1                | Primary outcome measure .....                    | 5         |
| 2.2                | Secondary outcome measures .....                 | 5         |
| <b>3.</b>          | <b>Data.....</b>                                 | <b>5</b>  |
| 3.1                | CRF Forms and variables.....                     | 5         |
| 3.2                | Management of datasets.....                      | 5         |
| 3.3                | Data completion schedule .....                   | 6         |
| 3.4                | Data verification.....                           | 6         |
| 3.5                | Data coding .....                                | 6         |
| <b>4.</b>          | <b>Definition of terms .....</b>                 | <b>7</b>  |
| <b>5.</b>          | <b>Sample Size Calculations.....</b>             | <b>7</b>  |
| <b>6.</b>          | <b>Analysis Principles.....</b>                  | <b>8</b>  |
| <b>7.</b>          | <b>Analysis Details .....</b>                    | <b>8</b>  |
| 7.1                | Recruitment and follow-up patterns .....         | 8         |
| 7.2                | Baseline Characteristics.....                    | 8         |
| 7.3                | Trial treatment.....                             | 9         |
| 7.4                | Trial events.....                                | 9         |
| 7.5                | Toxicity/ Symptoms.....                          | 9         |
| <b>8.</b>          | <b>Additional Information.....</b>               | <b>9</b>  |
| 8.1                | Trial management group (TMG).....                | 9         |
| 8.2                | Data Monitoring and Ethics Committee (DMEC)..... | 10        |
| <b>9.</b>          | <b>SIGNATURES OF APPROVAL.....</b>               | <b>11</b> |
| <b>Appendix 1:</b> | <b>summary Tables.....</b>                       | <b>12</b> |

# 1. BACKGROUND AND DESIGN

The trial hypothesis under investigation is that treatment with palifermin will improve surrogate clinical outcomes in adult patients with ALI and is safe.

The objectives of this trial are

- 1) To conduct a randomised, double-blind, placebo-controlled phase 2 trial of palifermin for the treatment of ALI and
- 2) To study the biological mechanisms of palifermin on pulmonary and systemic neutrophil function and inflammation; alveolar epithelial and endothelial function protease:antiprotease balance and lung extracellular matrix degradation and turnover

The trial is a prospective, randomised, double-blind, placebo-controlled phase 2, clinical study of palifermin in patients with ALI.

Patients will be randomised to Palifermin 60 µg/kg or normal saline placebo daily as a bolus intravenous injection for up to 6 days. Administration will not occur through an intravenous line that has been flushed with heparin. The intravenous line will be flushed with normal saline prior to and after study drug administration. The first dose of study drug will be administered within 4 hours of randomisation and subsequent doses will be at 10 am daily starting on the following calendar day.

Patients will be eligible to participate in the study if they fulfil the following criteria:

**Inclusion criteria:**

ALI as defined by acute onset of:

- a. hypoxic respiratory failure ( $\text{PaO}_2/\text{FiO}_2 \leq 40 \text{ kPa}$ )
- b. bilateral infiltrates on chest X-ray consistent with pulmonary oedema.
- c. no clinical evidence of left atrial hypertension or if measured, a pulmonary arterial occlusion pressure (PAOP) less than or equal to 18 mmHg.
- d. requirement for positive pressure mechanical ventilation via an endotracheal tube or tracheostomy.

All ALI criteria (a-d above) must occur within the same 24-hour period. The onset of ALI is when the last ALI criterion is met. Patients must be enrolled within 72 hours of ALI onset

**Exclusion criteria:**

1. Age < 18 years
2. More than 72 hours from the onset of ALI
3. Pregnancy
4. Participation in a clinical trial of an investigational medicinal product within 30 days
5. Consent declined
6. Current treatment with KGF
7. Known hypersensitivity to palifermin or Escherichia coli derived proteins
8. Previous adverse reaction to palifermin.
9. History of active malignancy excluding haematological malignancies.
10. Chronic liver disease with Child-Pugh score greater than 12.

The trial is summarised in Figure 1.

Figure 1. Trial schematic diagram

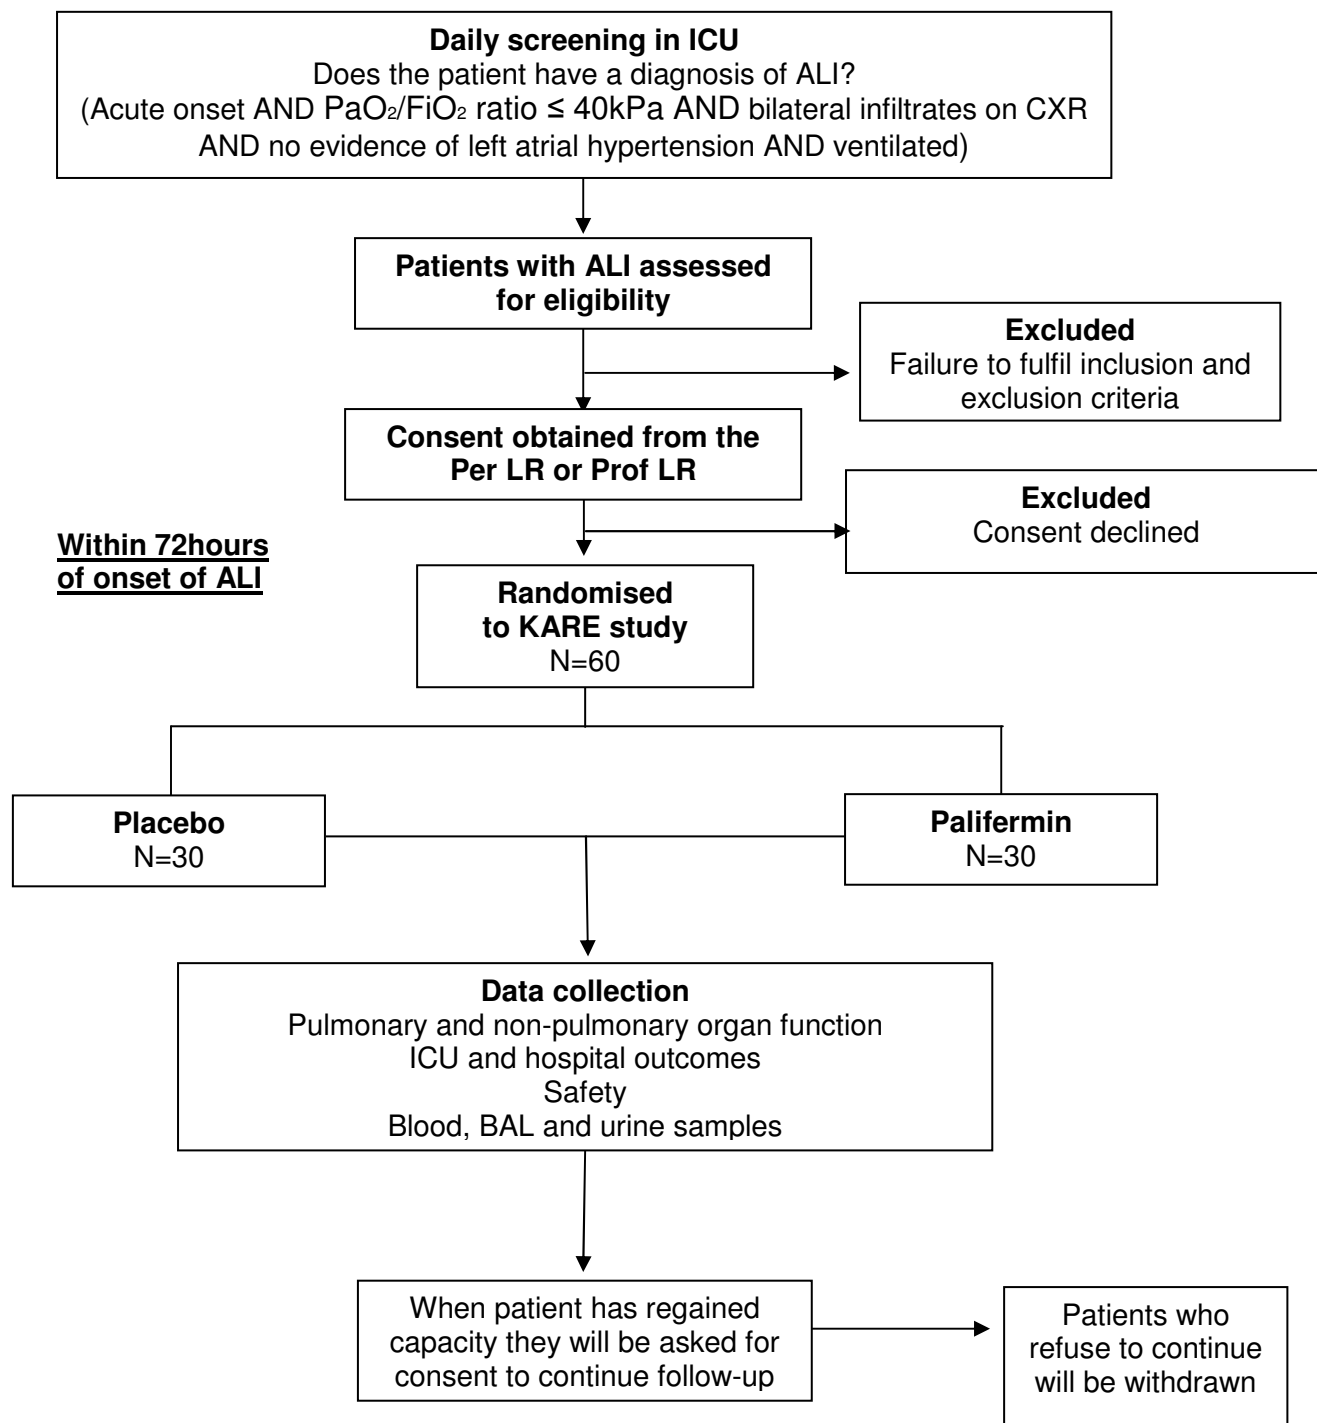

Full details of the background to the trial and its design are presented in the protocol.

## 2. OUTCOME MEASURES

### 2.1 Primary outcome measure

The primary endpoint of this clinical study is to evaluate the efficacy of palifermin to improve oxygenation index (OI) at day 7 or the last available OI prior to patient discontinuation from the study.

### 2.2 Secondary outcome measures

1. Oxygenation index (OI) at days 3 and 14
2. Physiological indices of acute lung injury, as measured by respiratory compliance (Crs) and P/F ratio at days 3, 7 and 14
3. Change in sequential organ failure assessment (SOFA) score from baseline to day 7 and 14
4. Safety and tolerability as assessed by the occurrence of AEs and Suspected Unexpected Serious Reactions (SUSARs).

Although the duration of ventilation and ICU stay as well as ICU and hospital mortality and 28-day mortality will also be documented, these important clinical outcomes are not included as major outcome measures as the study is not adequately powered to assess these outcomes.

The secondary objective of the study is to measure the biological effects of KGF on:

1. Systemic and pulmonary neutrophil function
2. Systemic and pulmonary inflammatory response
3. Systemic and pulmonary epithelial and endothelial function
4. Systemic and pulmonary protease and anti-protease balance
5. Pulmonary extracellular matrix (ECM) degradation and turnover

## 3. DATA

### 3.1 CRF Forms and variables

Full details of data collection and timing are described in the trial protocol (version 3.0 30 Nov 2012).

A copy of the CRF is presented in the Trial Master File.

### 3.2 Management of datasets

Below is the standard policy for management of data in the CRSC as given in the CTU SOPs.

At the time of analysis (including DMEC reports/Interim analysis (if required)):

The trial database will be stored in MACRO:

- In collaboration with the Statistician, the Data Manager will file out from MACRO a dataset of all data stored in the database. This will act as the frozen dataset. It is the responsibility of the statistician to accurately record the date of freezing and ensure all data is retrieved.
- New data can continue to be entered onto MACRO database.

- If any outstanding data queries are resolved during the analysis that relate to data in the frozen dataset (e.g. problems that are found during analysis or amended CRFs that are returned to the CRSC), the main MACRO database should be changed under the oversight of the Trial Data Manager.

### 3.3 Data completion schedule

The following table describes the time points for completion of clinical record forms.

|                           | Day 1 | Day 2-3 | Day 4 | Day 5-6 | Day 7 | Day 8-13 | Day 14 |
|---------------------------|-------|---------|-------|---------|-------|----------|--------|
| Eligibility assessment    | X     |         |       |         |       |          |        |
| Informed consent          | X     |         |       |         |       |          |        |
| Randomisation             | X     |         |       |         |       |          |        |
| Baseline data             | X     |         |       |         |       |          |        |
| Daily data                |       | X       | X     | X       | X     | X        | X      |
| Study drug administration | X     | X       | X     | X       |       |          |        |
| Adverse events            | X     | X       | X     | X       | X     | X        | X      |
| BAL sampling              | X     |         | X     |         |       |          |        |
| Blood and urine sampling  | X     |         | X     |         | X     |          | X      |

### 3.4 Data verification

Data verification, consistency and range checks will have been performed at the data entry stage by the CRSC, as well as checks for missing data (copies can be found in the Trial Master File). Additional range, consistency and missing data checks will be performed, as appropriate, when the analysis is performed (and when the datasets for analysis are constructed). All variables will be examined for unusual, outlying, unlabelled or inconsistent values.

Given the thorough nature of our follow-up procedure we expect the issue of missing data to be relatively minimal. We anticipate high compliance with initial data collection as this is close to the time of patient registration. If any data is missing imputation will not be done.

Any problems with trial data will be queried with the Trial Managers, Data Managers, or statisticians, as appropriate. If possible, data queries will be resolved, although it is accepted that due to administrative reasons and data availability a small number of problems will continue to exist. This will be minimised.

### 3.5 Data coding

The variable codings will be as specified on the CRF.

## 4. DEFINITION OF TERMS

Give definition of any terms that require explanation.

| Term                                             | Definition                                                                                                                                                                                                                                                             |
|--------------------------------------------------|------------------------------------------------------------------------------------------------------------------------------------------------------------------------------------------------------------------------------------------------------------------------|
| Oxygenation Index (OI)                           | $(\text{mean airway pressure (cm H}_2\text{O)} \times \text{FiO}_2 \times 100) \div \text{PaO}_2 \text{ (kPa)}$ <p style="text-align: center;"><b>or</b></p> $\frac{\text{Mean Airway Pressure (cmH}_2\text{O)}}{\text{PaO}_2(\text{kPa})/\text{FiO}_2 \text{ Ratio}}$ |
| Ideal Body Weight (IBW)                          | Males: $\text{IBW (kg)} = 50 + 0.91 \times (\text{height (cm)} - 152.4)$ .<br>Females: $\text{IBW (kg)} = 45.5 + 0.91 \times (\text{height (cm)} - 152.4)$                                                                                                             |
| Compliance (Cr <sub>s</sub> )                    | $\frac{\text{Tidal Volume(ml)}}{(\text{Plateau Pressure(cmH}_2\text{O)} - \text{Positive end-expiratory pressure (PEEP) (cmH}_2\text{O)})}$                                                                                                                            |
| Sequential organ failure assessment (SOFA) score | The SOFA score is made of 6 variables, each representing an organ system. Each organ system is assigned a point value from 0 (normal) to 4 (high degree of dysfunction/failure). The sum of these values gives the SOFA score ranging from 0 to 24.                    |

## 5. SAMPLE SIZE CALCULATIONS

The primary outcome measure will be the difference in OI between the palifermin and placebo treated groups at day 7. Day 7 is chosen as it is expected this time interval will minimise the competing effects of death and extubation, while at the same time allowing a sufficient time interval for a biological effect to occur. Based on the data from a recently completed clinical trial in ALI, the mean (standard deviation; SD) OI at day 7 in patients with ALI is 62 (51) cmH<sub>2</sub>O/kPa. A sample size of 56 subjects (28 in each group) will have 80% power at a two-tailed significance level of 0.05 to detect a clinically significant difference of 39 cmH<sub>2</sub>O/kPa in OI between groups. In a previous phase 2 study of similar size, it was found that an intervention can demonstrate a change in OI of a similar magnitude confirming a treatment effect of this size can be achieved.

In a previous single centre study of simvastatin in ALI there were no withdrawals. In a multi-centre UK study of pulmonary artery catheters in ICU patients (PAC-Man), no patients were lost to follow up, and only 2.4% withdrew consent after recovering competency. Therefore a drop-out rate of 5% has been estimated and the study will require a total of 60 patients (30 in each group).

Using the sample size of 60 patients determined from the primary outcome measure, the differences in the secondary outcomes at day 7 that can be detected between the groups are presented in table 3. Data are mean (SD). All calculations assume 80% power at a two-tailed significance level of 0.05.

**Table 3.**

| Outcome         | Value in patients with ALI | Detectable effect size |
|-----------------|----------------------------|------------------------|
| Crs (ml/cm H20) | 57.8 (36.5)                | 27.8                   |
| SOFA score      | 7.2 (4.2)                  | 3.2                    |

## 6. ANALYSIS PRINCIPLES

Standard approaches will be used to detect patterns in missing data. Analyses will be on an intention-to-treat basis. A single analysis is planned at the end of the trial. A P value of 0.05 will be considered as statistically significant and all tests will be two-sided.

For continuously distributed outcomes, differences between groups will be tested using independent samples t-tests, analysis of variance (ANOVA) and analysis of covariance (ANCOVA) with transformations of variables to Normality if appropriate, or non-parametric equivalents. Chi-squared tests (or Fisher's Exact tests) will be used for categorical variables.

Correlations between changes in the biological markers measured and physiological and clinical outcomes will be assessed by appropriate graphical and statistical methods including Chi-square and Pearson's correlation coefficient.

The primary outcome measure is OI at day 7 and other important time points for clinical outcomes such as OI are days 3 and 14, respiratory compliance (Crs) and P/F ratio at days 3, 7 and 14 and change from baseline in SOFA at days 7 and 14.

The randomisation is stratified by severe sepsis requiring vasopressor requirement.

Censorship of data collection will occur at day 90 post randomisation.

A secondary exploratory analysis will be undertaken following collection of all biological mechanism data and will be reported separately.

## 7. ANALYSIS DETAILS

The results of the analyses will be reported following the principle of the ICH E3 guidelines on the Structure and Content of Clinical Study Reports.

### 7.1 Recruitment and follow-up patterns

- Recruitment by year
- The number of withdrawals by treatment group

### 7.2 Baseline Characteristics

The randomisation is stratified by severe sepsis requiring vasopressors.

- Gender, no. (%) by treatment arm
- Height and weight, mean (sd) by treatment group
- Severe sepsis requiring Vasopressors, no. (%) by treatment arm
- ALI aetiology, no. (%) by treatment arm
- Age at baseline assessment, mean (sd) by treatment arm



- Apache II score, mean (sd) by treatment arm
- Plateau Pressure and PEEP, mean (sd) by treatment arm
- Tidal Volume, mean (sd) by treatment arm
- SAPs II score, mean (sd) by treatment arm
- LIS, mean (sd) by treatment arm
- Oxygenation Index, mean (sd) by treatment arm
- Respiratory Compliance (Cr<sub>s</sub>), mean (sd) by treatment arm
- PaO<sub>2</sub>/FiO<sub>2</sub> ratio, mean (sd) by treatment arm
- SOFA score, mean (sd) by treatment arm
- Lowest Mean Arterial Pressure, mean(sd) by treatment arm

### 7.3 Trial treatment

- Number of treatments administered
- Treatment compliance/tolerance including reasons for early discontinuation or protocol violations, no (%) by treatment arm
- Frequency and reason for dose modification and delays by treatment arm

### 7.4 Trial events

- Oxygenation Index (OI) at day 7 or the last available OI prior to patient discontinuation from the study, mean (sd) by treatment arm
- Oxygenation index (OI) at days 3 and 14, mean (sd) by treatment arm
- Respiratory compliance (Cr<sub>s</sub>) at days 3, 7 and 14, mean (sd) by treatment arm
- P/F ratio at days 3, 7 and 14, mean (sd) by treatment arm
- Change in sequential organ failure assessment (SOFA) score from baseline to day 7 and 14, mean (sd) by treatment arm

### 7.5 Toxicity/ Symptoms

- Adverse Events (AEs), Serious adverse events (SAEs) and occurrence of suspected unexpected serious adverse reactions (SUSARs), no. (%) by treatment arm

## 8. ADDITIONAL INFORMATION

### 8.1 Trial management group (TMG)

The TMG will consist of the Chief Investigator, co-investigators and staff from the CTU. The Chief Investigator will have overall responsibility for the conduct of the study. Dr Mark Cross will be responsible on a day-to-day basis for the trial. Regular meetings of the TMG will be held to discuss and solve problems and monitor progress. The Chairman of CritPaL (Barry Williams) will advise the TMG and will represent the patient's perspective ensuring that the trial remains considerate of the needs of the patients and their families.

The Chief Investigator will take responsibility for the need to change the protocol for any reason, reviewing relevant information from other sources and considering recommendations from the DMEC.

## **8.2 Data Monitoring and Ethics Committee (DMEC)**

A DMEC will be appointed. The committee will be independent of the study team and will comprise an intensive care clinician and a clinician with experience in undertaking clinical trial. The DMEC will meet to agree conduct and remit. The DMEC will meet after the first 5 patients have been enrolled into the study and meet every 6 months thereafter. In the event of an occurrence of an unexpected severe adverse reaction an additional unplanned DMEC meeting will be convened. As this is a phase 2 trial, an interim analysis of efficacy is not planned although this issue can be discussed by the DMEC as required. The DMEC will function primarily as a check for safety, reviewing adverse events. They will report any issues pertaining to safety to the Chief Investigator. It will be the responsibility of the Chief Investigator to inform the sponsor who will take appropriate action to halt the trial if concerns exist about patient safety.

Include in the appendix any additional information that is relevant to the analyses such as:

- Additional sample size issues
- Changes in trial objectives e.g. change in comparisons groups
- Amendments to the SAP
- Example Draft Summary Tables

## Appendix 1: summary Tables

**Table x. Baseline Characteristics at trial entry**

|                                           | <b>KGF<br/>n = (%)</b> | <b>Placebo<br/>n = (%)</b> |
|-------------------------------------------|------------------------|----------------------------|
| Age (years)                               |                        |                            |
| Gender                                    |                        |                            |
| Male                                      |                        |                            |
| Female                                    |                        |                            |
| Height                                    |                        |                            |
| Weight                                    |                        |                            |
| Severe Sepsis Requiring Vasopressors      |                        |                            |
| Plateau Pressure (cmH <sub>2</sub> O)     |                        |                            |
| APACHE II score (predicted mortality %)   |                        |                            |
| SAPs score (predicted mortality %)        |                        |                            |
| LIS score                                 |                        |                            |
| PaO <sub>2</sub> :FiO <sub>2</sub> ratio: |                        |                            |
| Tidal Volume (ml/kg Ideal Bodyweight)     |                        |                            |
| PEEP                                      |                        |                            |
| Compliance                                |                        |                            |
| Aetiology of ARDS                         |                        |                            |
| Direct                                    |                        |                            |
| Smoke/toxin inhalation                    |                        |                            |
| Gastric content aspiration                |                        |                            |
| Near drowning                             |                        |                            |
| Thoracic trauma                           |                        |                            |
| Pneumonia                                 |                        |                            |
| Other                                     |                        |                            |
| Indirect                                  |                        |                            |
| Sepsis                                    |                        |                            |
| Cardiopulmonary bypass                    |                        |                            |
| Pancreatitis                              |                        |                            |
| Non-thoracic trauma                       |                        |                            |
| Other                                     |                        |                            |
| SOFA Score                                |                        |                            |
| Oxygenation Index                         |                        |                            |
| Lowest Mean Arterial Pressure (mmHg)      |                        |                            |

Mean (SD) presented for continuous variables and no. (%) for all categorical variables.

**Table x. Treatment after Trial Entry**

|                                                                                                                                                                                                                                                                                                                                     | <b>KGF<br/>n = (%)</b> | <b>Placebo<br/>n = (%)</b> |
|-------------------------------------------------------------------------------------------------------------------------------------------------------------------------------------------------------------------------------------------------------------------------------------------------------------------------------------|------------------------|----------------------------|
| Study drug given                                                                                                                                                                                                                                                                                                                    |                        |                            |
| No. of days on treatment*                                                                                                                                                                                                                                                                                                           |                        |                            |
| Reasons for termination of study drug<br>6 days after randomisation<br>2 days following discontinuation of assisted ventilation<br>Study drug related AE<br>Discharge from Critical Care<br>Request from PerLR/ProfLR/patient<br>Discontinuation of active treatment<br>Decision by a Physician on safety grounds<br>Death<br>Other |                        |                            |
| Protocol violations:<br>Post-randomisation withdrawal<br>Refused use of data already collected<br>Refused data collection from NHS records<br>Withdrew from follow-up<br>Ineligible patient<br>Did not receive allocated treatment<br>Received treatment of other group                                                             |                        |                            |

\*Mean (SD) no. of days on treatment and no. (%) for all categorical variables.

**Table x: Main Clinical Outcome variables**

|                                                                                  | <b>KGF<br/>n = (%)</b> | <b>Placebo<br/>n = (%)</b> | <b>Difference<br/>(95% CI)</b> | <b>p-value</b> |
|----------------------------------------------------------------------------------|------------------------|----------------------------|--------------------------------|----------------|
| Primary outcome OI at day 7 or at the last available OI prior to discontinuation |                        |                            |                                |                |
| Oxygenation Index<br>Day 3<br>Day 14                                             |                        |                            |                                |                |
| Respiratory compliance<br>Day 3<br>Day 7<br>Day 14                               |                        |                            |                                |                |
| P/F ratio<br>Day 3<br>Day 7<br>Day 14                                            |                        |                            |                                |                |
| SOFA<br>Day 7<br>Day 14                                                          |                        |                            |                                |                |

Mean (SD) presented for treatment arms

**Table x: Safety Outcomes**

|                             |                                      | <b>KGF</b><br><b>n = (%)</b> | <b>Placebo</b><br><b>n = (%)</b> |
|-----------------------------|--------------------------------------|------------------------------|----------------------------------|
| <b>AEs, SAEs and SUSARs</b> | Total SAES                           |                              |                                  |
|                             | Related to study drug                |                              |                                  |
|                             | Related to study drug and unexpected |                              |                                  |
|                             | Total AES                            |                              |                                  |
|                             | Related to study drug                |                              |                                  |
| <b>SAEs*</b>                | Cardiac Arrhythmia                   |                              |                                  |
|                             | Cardiac General                      |                              |                                  |
|                             | Gastrointestinal                     |                              |                                  |
|                             | Etc.....                             |                              |                                  |
| <b>AEs*</b>                 | Cardiac Arrhythmia                   |                              |                                  |
|                             | Cardiac General                      |                              |                                  |
|                             | Gastrointestinal                     |                              |                                  |
|                             | Etc.....                             |                              |                                  |

\* All AEs and SAEs will be classified using Common Terminology Criteria for Adverse Events (CTCAE) Version 4 (v4.03: June 14, 2010). Example categories are detailed here.

**Table x: Haemodynamic variables, Ventilator variables and Clinical parameters**

|                                            | <b>Baseline<br/>KGF PI</b> | <b>Day 3<br/>KGF PI</b> | <b>Day 7<br/>KGF PI</b> | <b>Day 14<br/>KGF PI</b> |
|--------------------------------------------|----------------------------|-------------------------|-------------------------|--------------------------|
| Mean arterial Pressure                     |                            |                         |                         |                          |
| Daily fluid balance (L)                    |                            |                         |                         |                          |
| Furosemide (mg in 24 hours)                |                            |                         |                         |                          |
| PEEP                                       |                            |                         |                         |                          |
| Plateau pressure (cm H <sub>2</sub> O)     |                            |                         |                         |                          |
| Mean airway pressure (cm H <sub>2</sub> O) |                            |                         |                         |                          |
| Peak pressure (cm H <sub>2</sub> O)        |                            |                         |                         |                          |
| Tidal volume                               |                            |                         |                         |                          |
| PF ratio (no unit)                         |                            |                         |                         |                          |
| OI (no unit)                               |                            |                         |                         |                          |
| LIS (no unit)                              |                            |                         |                         |                          |

Mean (SD) presented for continuous variables and no. (%) for all categorical variables.

**Table x: Survival data and length of ventilation and stay data**

|                                                | <b>KGF</b> | <b>placebo</b> | <b>p value</b> |
|------------------------------------------------|------------|----------------|----------------|
| 28 day survival (yes/no)                       |            |                |                |
| Ventilator free days (days) to 28 days         |            |                |                |
| ITU free days (days) to 28 days                |            |                |                |
| Duration ventilation (days)                    |            |                |                |
| ITU survival (yes/no)                          |            |                |                |
| Length of ICU stay (days)                      |            |                |                |
| Hospital survival (yes/no)                     |            |                |                |
| Hospital length of stay (days)                 |            |                |                |
| All cause mortality 28 days post randomisation |            |                |                |
| Death before discharge from ICU                |            |                |                |
| Death before discharge from hospital           |            |                |                |

Mean (SD) presented for continuous variables and no. (%) for all categorical variables.
